# Supplementary material for: Calibrating estimates of ionospheric long-term change
Source: Copernicus journal article supplement (doi:10.5194/egusphere-2023-2599), 2023-11-08
Supplement: Supplementary file [file egusphere-2023-2599-AC2-supplement.pdf]

## Response to reviewer #2

*Scott et al provide a compelling case that previous efforts to discern climate-driven lowering of the ionosphere have been hampered by a reliance on semi-empirical equations which incorrectly assume any F1 layer present has an insignificant effect.*

*They show F1 layers can cause biases in height estimates which risk masking any climate trends, or causing misattributions.*

*They attribute this to thermospheric composition effects, driven by geomagnetic activity.*

*The manuscript is of very high quality, and only needs a few revisions - should be minor in effort - to exclude some minor remaining doubts about potentially confounding effects, and make their case unarguable. As well as to make some of their reasoning a little more explicit, improving their work's accessibility to a wider audience. A more detailed breakdown of general and specific comments, and technical corrections is attached.*

*Slightly weaker however: foF1 <-> composition link*

*• Physical rationale (introduced ~L364, invoked ~L405) linking presence of foF1 to composition changes (maybe a priori knowledge I lack - make this more explicit if so!)*

Thank you for this insight. We agree that adding some additional information about the influence of thermospheric composition on the presence of the F1 layer would make the paper more stand-alone.

We propose adding the following text to section 1.1;

“The shape of the electron concentration profile is influenced by the composition of the neutral thermosphere, through the loss rate of ionisation. At equilibrium, the electron concentration,  $N$ , can be expressed as (Rishbeth & Garriott, 1969);

$$N = \left(\frac{q}{2\beta}\right) \left[1 + \left(1 + \frac{4\beta^2}{\alpha q}\right)^{\frac{1}{2}}\right]$$

where  $q$  is the ion production rate ( $s^{-1}$ ),  $\alpha$  is the loss rate of molecular ions ( $s^{-1}$ ) and  $\beta$  is the loss rate of atomic ions ( $s^{-1}$ ).

Between the E and F2 layers, there is often an additional layer, the F1 layer, visible on ionograms. This layer forms between 160-200km where the loss rate of ionisation transitions from being dominated by the loss of molecular ions at the lower altitudes in the E layer where;

$$N = N_{\alpha} = \left(\frac{q}{\alpha}\right)^{\frac{1}{2}}$$

to a loss process dominated by atomic ions at the higher altitudes of the F2 layer where;

$$N = N_{\beta} = \frac{q}{\beta}$$

Ratcliffe (1956) first suggested that the transition between molecular to atomic loss processes may account for the splitting of the F region into two distinct layers, with the parameter  $\beta^2/\alpha q$  determining the shape of the electron distribution with height. Denoting this quantity as  $G$  at the level of peak production,

$$G = \frac{\beta^2}{\alpha q} = \frac{N_{\alpha}^2}{N_{\beta}^2}$$

Figure 28 in Rishbeth & Garriott, 1969 (reproduced as figure 1 in Scott et al, 2019) presents the vertical profile of electron concentration for a range of values of  $G$ . When  $G$  is small ( $<1$ ), the presence of the F1 layer is barely visible in the profile, becoming a much more pronounced inflexion for larger values of  $G$ . In this way, the prominence (and thus visibility) of the F1 layer on an ionogram is a function of the ratio of molecular and ion loss rates, with the ion composition itself being controlled by the composition of the neutral thermosphere. F1 layers are a daytime phenomenon, prominent during summer months.

While the presence of F1 layers in historic ionograms is tabulated (in terms of peak frequency  $f_oF1$  and virtual height,  $h'F1$ ), these do not record the prominence of the layer, from which a more detailed understanding of the ionospheric and thermospheric composition profiles could be gleaned."

Figure from R&G presented for reference in this review:

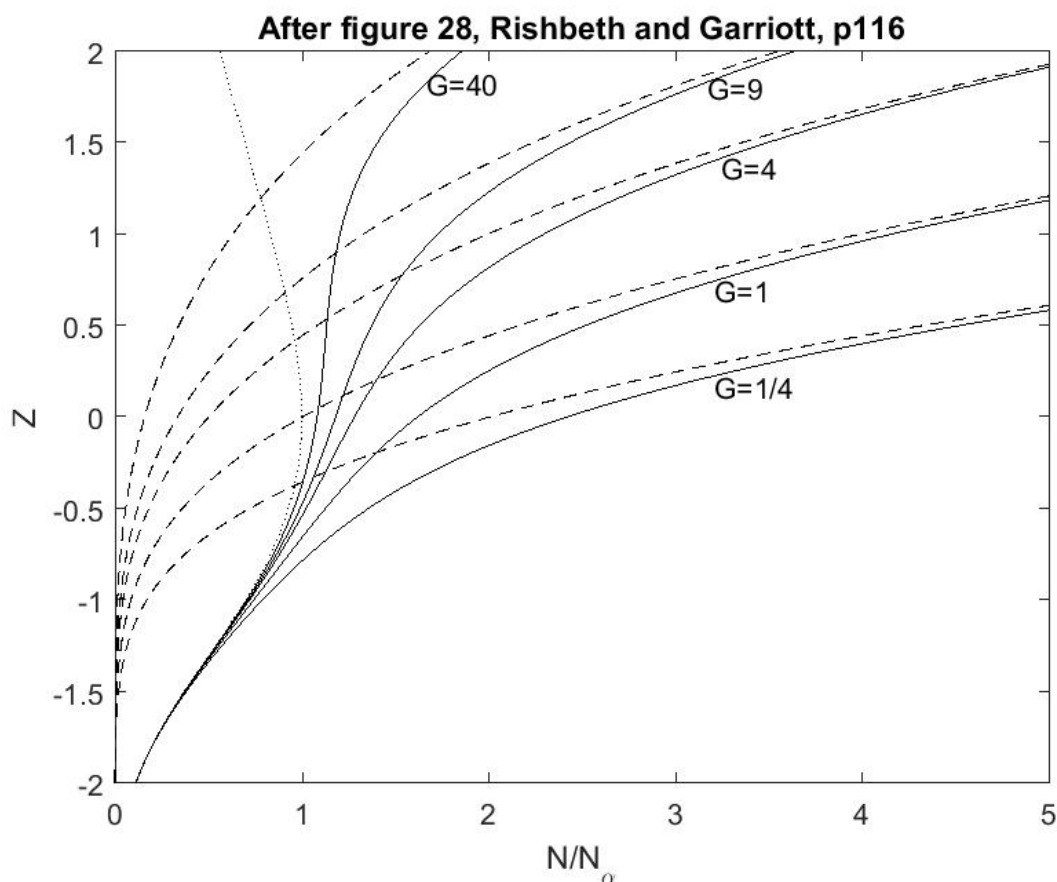

• Qualitative support from composition proxy in 8b showing similar trend to 8a Am not familiar with this Wright & Conkright proxy, and I note comment CC1 queries it...

In addition to the text above which introduces this concept, we have added the following text to make it clear where the idea of using this as a proxy for compositional change came from.

“Similarly, changes in neutral composition affect the peak electron concentration of the F2 layer. At noon, where the F2-layer approaches a steady-state condition, production and loss are in equilibrium. If the loss rate of ionisation is enhanced by the presence of molecular ions, the peak electron concentration of the layer will be reduced. Since the electron concentration is proportional to the peak frequency squared, comparison can be made

between measurements at similar dates but different times in the solar cycle by scaling these values by the ion production rate,  $q$ . A good proxy for  $q$  is the F10.7cm solar radio flux. Thus

$$N \propto \frac{f^2}{q} \equiv \frac{foF2^2}{F10.7}$$

Using noon values of foF2 to track qualitative changes in thermospheric composition was suggested by Rishbeth et al (1995) with Wright and Conkwright (2001) comparing the efficacy of this simple index (their FFD index, averaged over 5 hours around noon) with other more complex indices derived from the rate of change of the ionosphere at sunrise.”

• *Discussion of annual/semi-annual circulation-induced changes to composition in L430-L447 seems to suggest foF2 is more affected than foF1: L441 “foF2 is suppressed... when foF1 is at its peak”*

*So it would be good if the foF1 <-> composition link rationale could be tightened up a little*

Hopefully the above description has given a greater insight into the role of thermospheric composition in splitting of the F-layer and the modulation of the peak density seen in the F2 layer. The occurrence of an F1 layer is most prominent around noon in the summer months while (for Slough/Chilton at least) the F2 peak is weakest during the summer months when the concentration of molecular species at F2 altitudes is greatest.

#### ***Attribution of effect to F1: exclude E as a confounder***

*While the F1 evidence seems good, I'm a bit concerned that the apparent “smoking gun” in the derived parameters means you may not have looked at the raw data, to see if there are other potential causes for the patterns you've discerned.*

*Specific areas of concern:*

- *the domain of validity for B&D model is for  $x_E (= foF2/foE) > 1.7$*
- *both  $x_F$  and  $x_E$  share a common numerator, so I'd expect them to be somewhat correlated*

*Data-wise:*

- *What happens if you create an equivalent to Fig 4, but order the hmF2 bias by  $x_E$ ?*
  - *Is there a similar “break” partway along?*
  - *Shouldn't be, if the B&D model for hmF2( $x_E$ ) is decent along its validity range...*
  - *but worth double-checking, in case of any nasty non-linearities?*
- *Likewise does any of your data have  $x_E \leq 1.7$  (i.e. outside of B&D validity range)?*
  - *What happens to bias then?*

*Physically:*

- *Might composition changes affecting foF1 also affect foE?*

*I think it's worth being certain that the attribution to foF1 contamination is rock-solid.*

*Not least as a foE effect might be good news: given foE scaled more frequently than foF1, if any effect can be characterised, might give more data for looking at trends globally using already-manually scaled parameters, without data-rescue-based inversions?*

*See my suggestion below on a few supplementary material plots for probing foF1 attribution.*

- *there may be other ways of excluding potential confounders of foF1 attribution*

This has been an incredibly useful insight, thank you.

We had not tested to see if there was any bias in the foF2/foE ratio, having assumed that this had been considered when formulating the initial empirical relation. As has been stated in the literature however, the empirical relations are honed for a specific station and may therefore not hold for other locations or times.

Repeating the analysis looking at the foF2/foE ratio revealed a very similar (and larger) bias for values below around 2.5 (values below 1.7 are automatically excluded as the form of the equation means that it fails for values below this limit). A robust fit to these data gives a best fit line of  $y=80 (\pm 9) + -194 (\pm 19)$

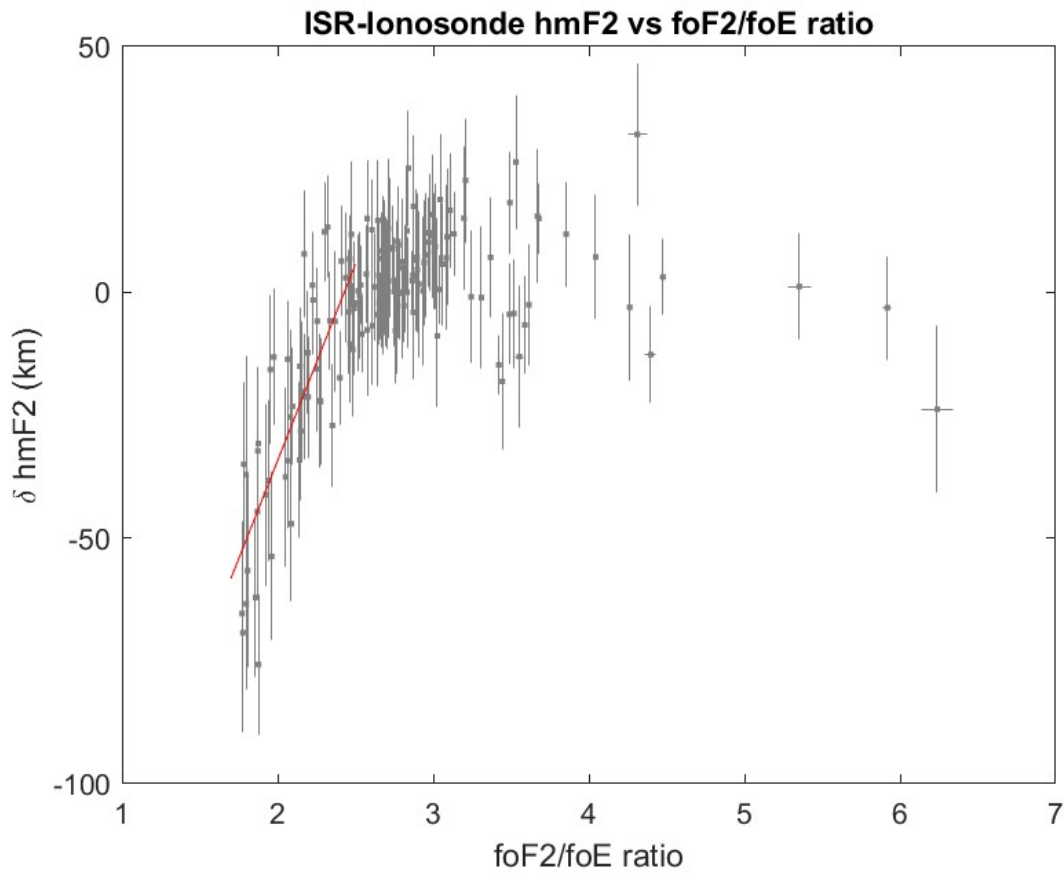

Fitting this bias and correcting for it results in a gradient of  $0.97 \pm 0.01$  when comparing the ISR and ionosonde-derived hmF2 values).

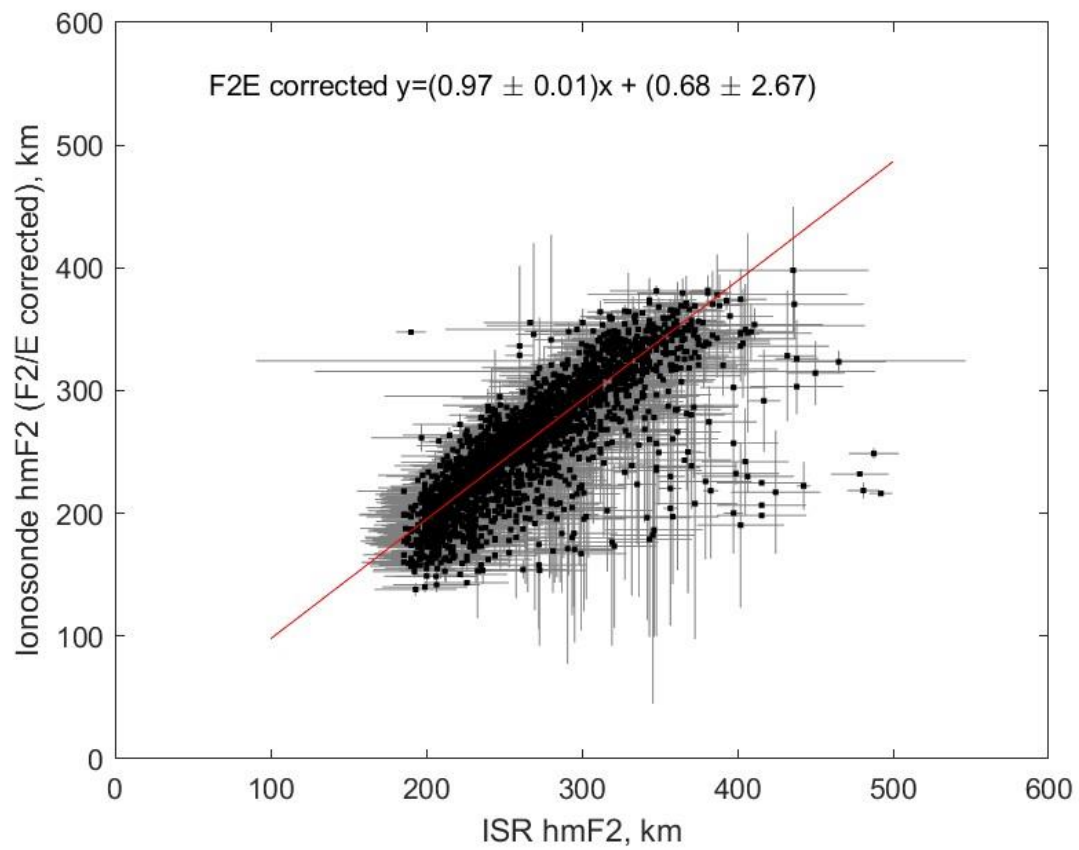

The foF2/foE ratio is also affected by changes in composition through modulation of the peak F-region density, which in turn affects the value of foF2. Since foF2 is suppressed by compositional changes during the day in summer, this effect is coincident with the presence of F1 layer ionisation which may also be contributing to the bias.

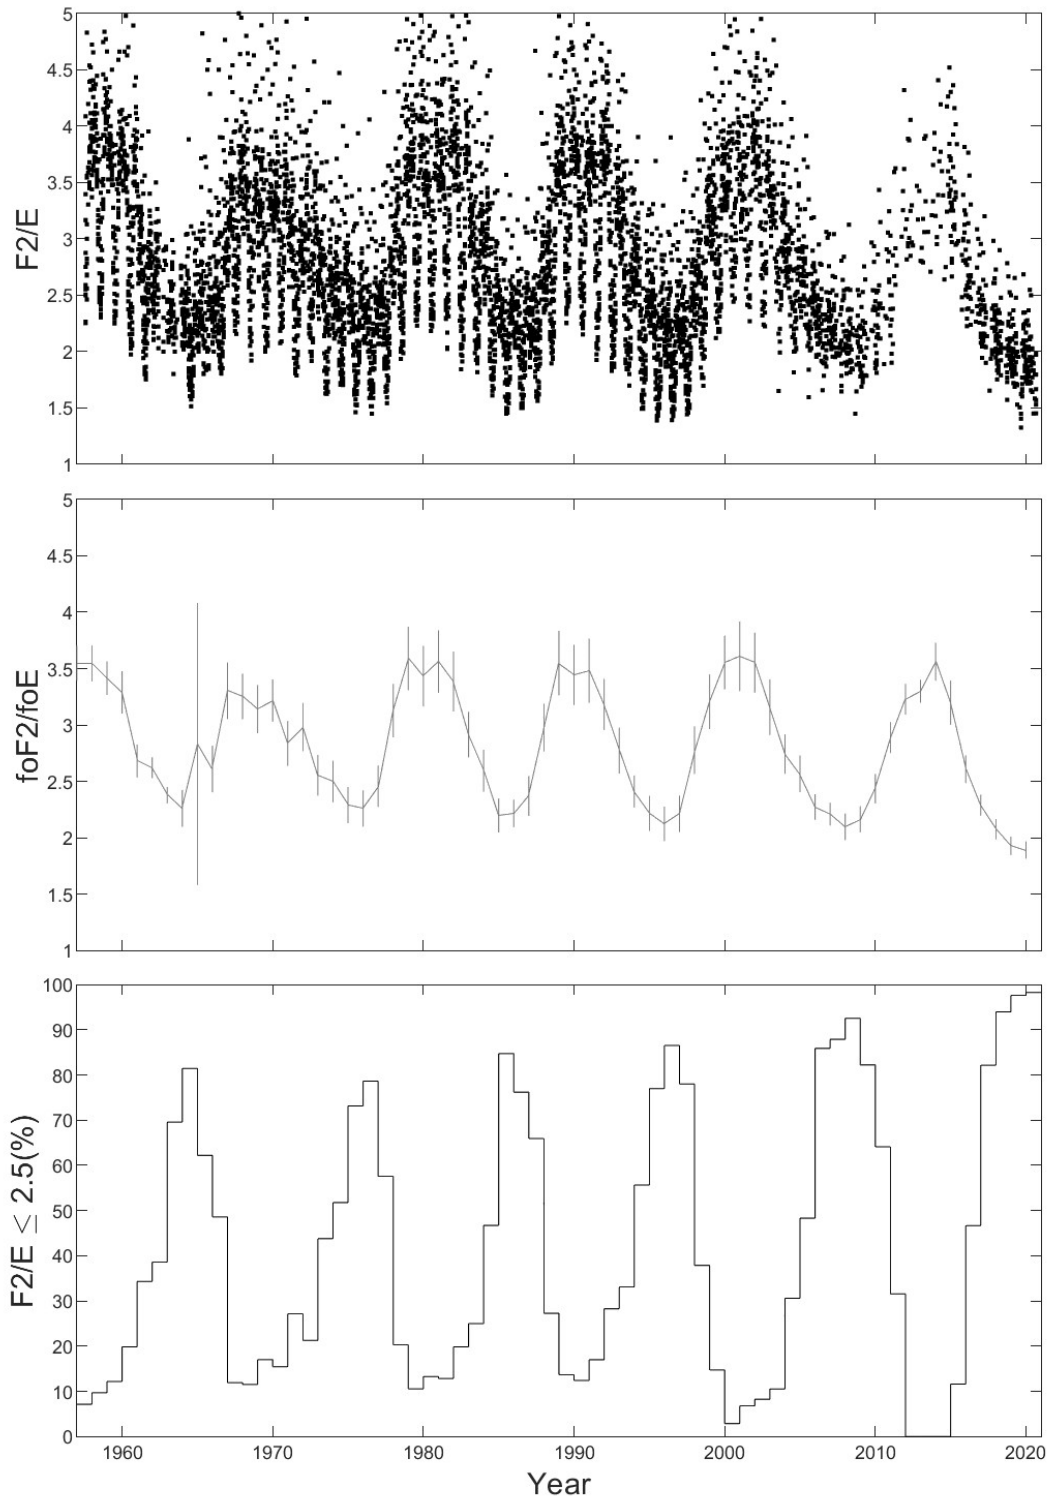

Such a correction introduces a significant amount of noise however which completely masks any subsequent effect due to the presence of foF1. As the referee points out, the two

parameters are highly correlated and so, while a comprehensive correction cannot easily be applied to the ionosonde-derived estimates of hmF2 (and such an effort, even if successful, would only be relevant to this geographical location) our conclusion remains that long-term changes in composition lead to biases in the estimate of hmF2 when using the empirical formula. Furthermore, these biases will be different for different locations, as previously demonstrated for Slough and Stanley

We propose addressing this by treating the two effects separately in the paper and discussing the subsequent impact on estimates of long-term change in hmF2.

### ***Enhance existing plots***

*On ISR subpanel, worth adding a horizontal line / note in caption that there's a 180 km threshold getting imposed to avoid sporadic E layer?*

- *This to help readers spot this in subsequent plots*
- *And consider this when ISR is acting as source of truth*

*Add a 3rd subpanel below current two, plotting  $\delta hmF2 = hmF2_{ISR} - hmF2_{ionosonde}$*

Figure 1 amended, as suggested

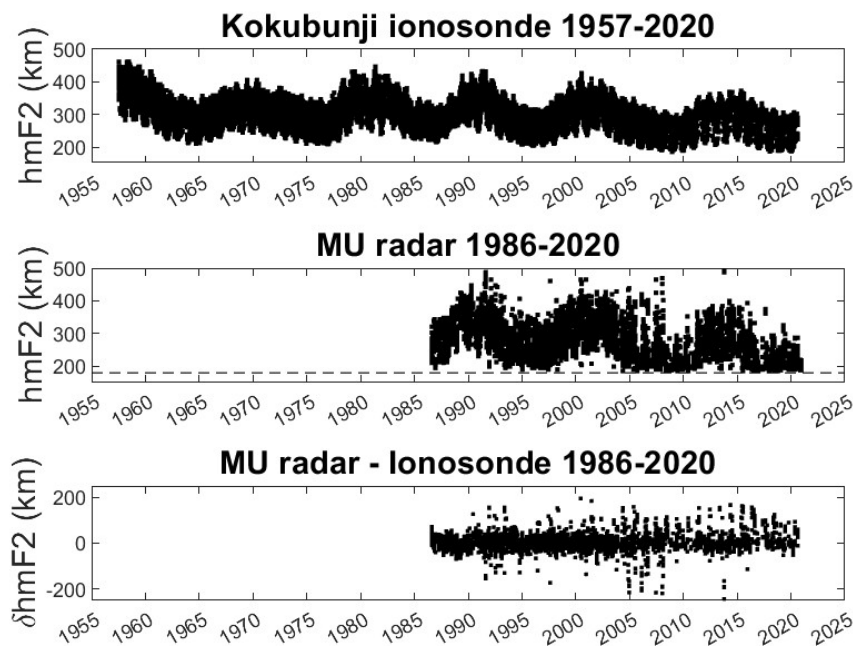

**Figure 2: break out the day/night/terminator populations**

Recommend changing this to a 2x2 subpanel plot

- keep current plot as an “all populations” subpanel
- but use other 3 subpanels to plot each day/night/terminator population separately

Current plot is good for general intercomparison of the three populations, and reasoning about the “all” fit. But overplotting means it’s hard to see & assess any detailed features in each population.

E.g. there seem to be ~two distinct clumps in the nighttime population, above/below the main trendline, at low/high ISR hmF2. But as everything is overplotted, it’s hard to assess if there’s anything similar in the twilight/ day populations, e.g.

- do they have similar clumps?
- if so, do their “upper” clumps also contain ISR hmF2s which hit the 180 km floor?

Likewise hard to see scatter cores - is anything interesting lurking in there?

Overall makes it harder to assess validity of the linear fits. These look OK, but good to reassure reader before these get used (Fig 5, 8a)

Thanks for this very useful suggestion. We have revised figure 2 as suggested;

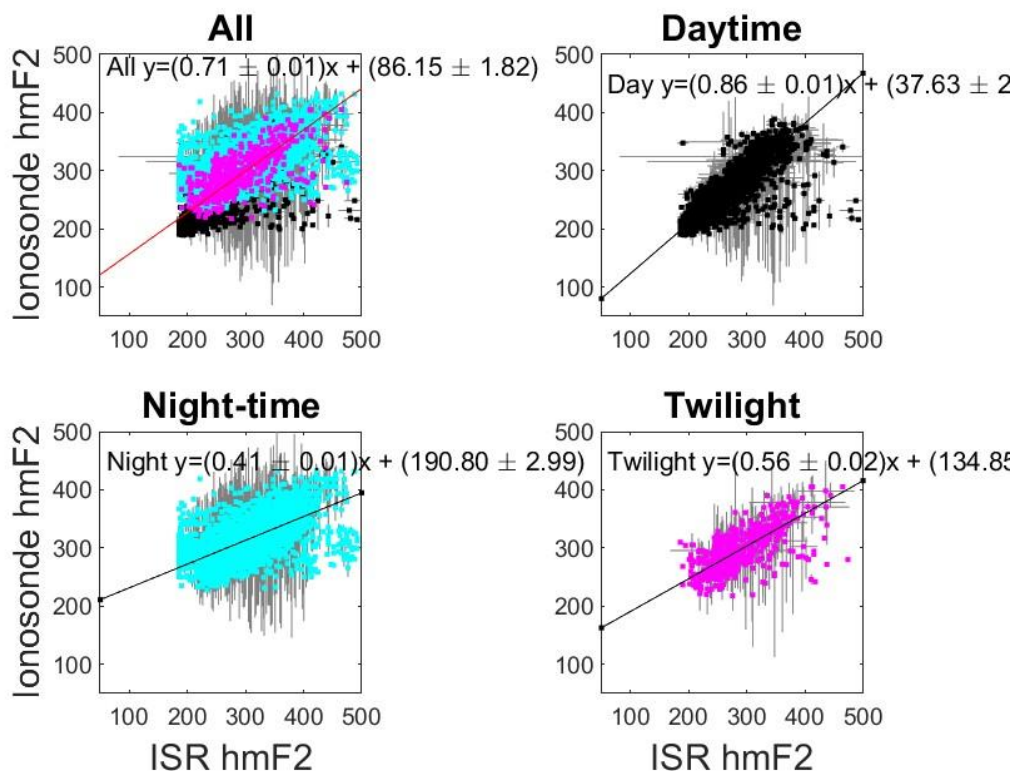

(we have changed the yellow to magenta as the yellow was less clear when these data were plotted on their own). We also have plotted best fit lines for these populations for comparison. In addition to the scatter, the assumption that foE=0.4 MHz when below the detection threshold of the ionosonde introduces a bias in estimates of hmF2 via the foF2/foE ratio. The twilight population has less scatter and a slightly better gradient of 0.56, this is consistent with values of foE that are larger than 0.4 MHz but are nonetheless below the detection threshold of the ionosonde (typically ~ 1 MHz).



**Figure 3: plot the delta\_hmF2; bin count / 180 km count**

These plots are great for probing the seasonal and local time behaviour, but I think they could be made even more revealing.

Again I'd recommend inflating this to a 2x2 plot. Keep the current two, but add:

- 3: subpanel of delta\_hmF2
  - 4: subpanel of number of year bins [0 - 35] which have contributed to the ISR mean value in current lower panel
- 3: to help readers spot the differences, and quantify these. Very hard to compare colours by eye! Might also reveal more subtle differences.
- 4: to check there's no concerns about quality of ISR averages in any bins I hope that the 48% occupancy you report for the 35 years means there's ~16-17 counts per ISR month-localtime bin. But I think worth exposing bin count to be sure:
- as you're treating ISR as ~truth-ier than ionosonde
  - as ISR is a campaign-based instrument, and campaigns might clump in season-localtime space!
  - as this ISR climatology seems to be showing a few interesting features (e.g. dips in summertime night hmF2)
- worth checking these are robust!  
- are these summertime night dips likely to be real?  
- if not, could they be contributing to bias?

Again, another useful suggestion, thank you.

We have modified the plot as suggested;

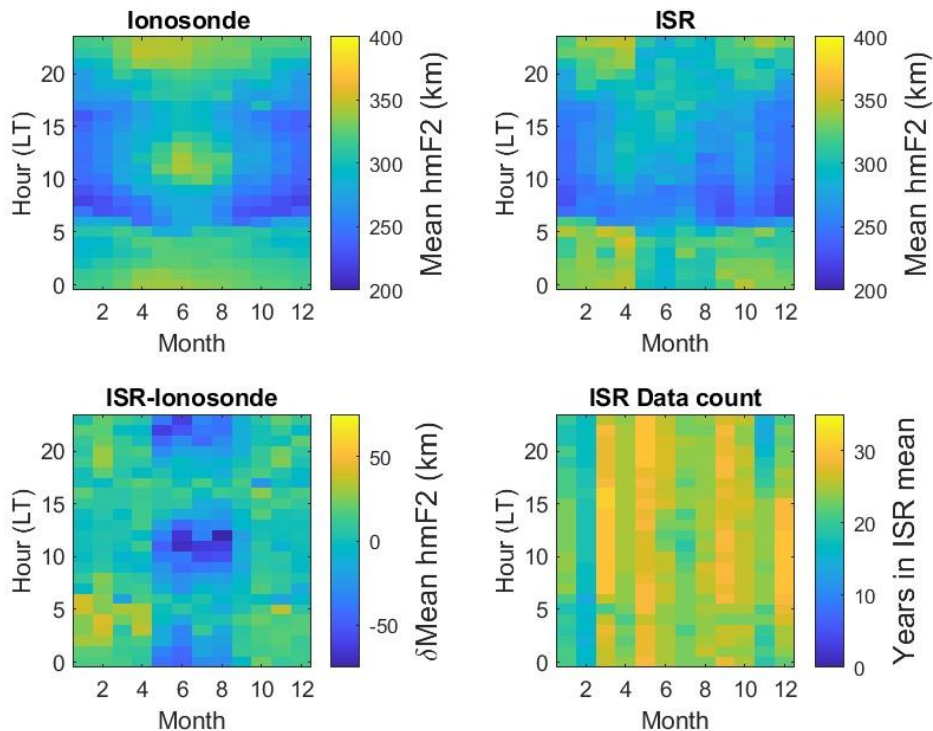

The new difference plot shows that the summertime bias is large despite there being above average numbers of ISR data available in these months from which to calculate mean values. In addition, we note that the minimum number of ISR data available in a bin was 14, the maximum number was 31 and the median was 25.

alternative 4: fraction of bin with ISR hmF2 = 180 km If the ISR bins all turn out to have OK-ish occupancy, flat enough that you don't think there's an issue, I think you can simply report this in text, and use the subpanel to look at other minor concern instead:

- The 180 km threshold on ISR will skew the bin mean value
  - and in worst case (all "true" ISR hmF2 values in bin across years < 180 km) set it to 180
- This might be affecting some of the blue-er bins. You could quantify this by calculating what fraction of the counts in each bin have values = 180 km.

We did not consider this option since if the maximum electron density was found to be either the minimum or maximum height within the window considered, the value was set to a null value and not included in subsequent calculations. We will make this clearer in the revised text.

**Figure 5: plot delta\_hmF2**

The daytime summer peak has clearly gone, but it's hard to compare colours here to Fig 3b, to get anything more out of this.

Again, recommend adding a subpanel for delta\_hmF2 - help readers compare with the previous delta\_hmF2, see if there's anything more here.

Will also support your discussion of the nighttime hmF2 differences remaining

- in L365
- in L388 - let you be a bit more nuanced - your "generally lower" point may apply across all months, but doesn't apply in summer months.

We have added the additional subplot, as suggested;

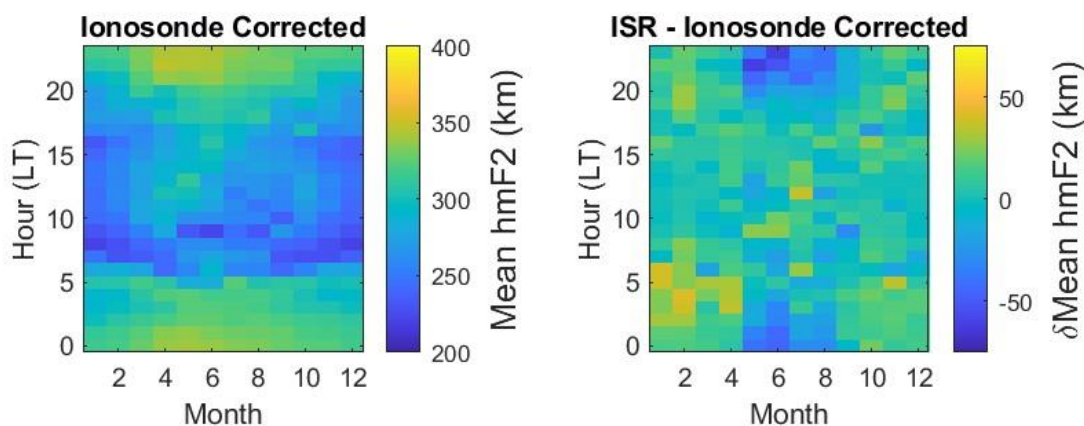

This indeed reveals that the corrected ionosonde-derived estimates of hmF2 in summer daytime are now closer to those observed by the ISR.

So, what is the cause?

We plotted the ratios as a function of season and time of day.

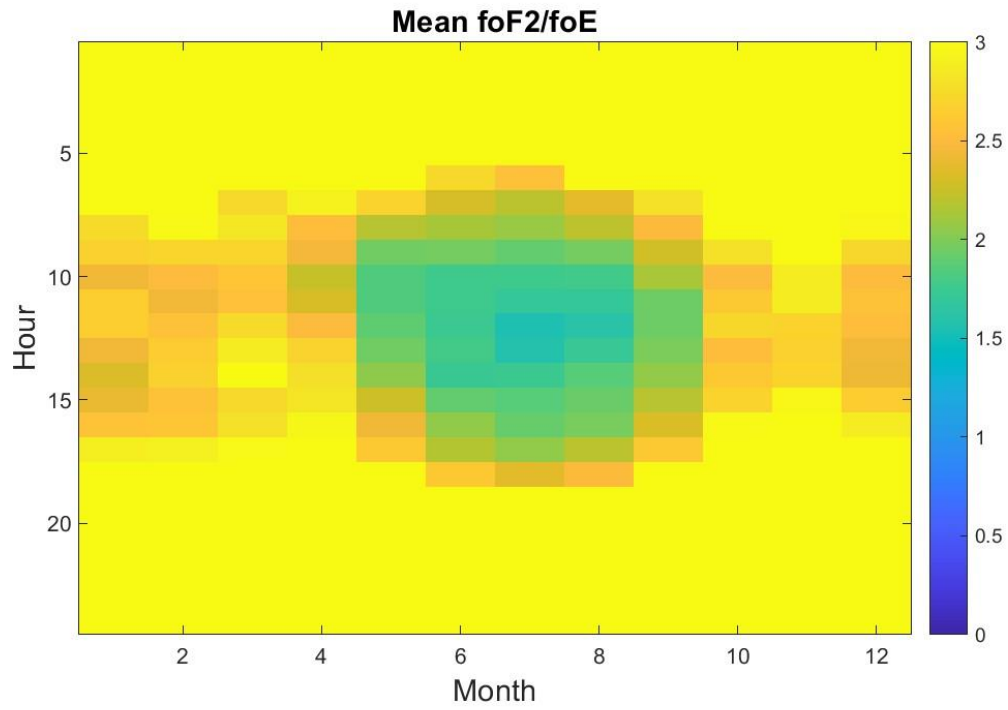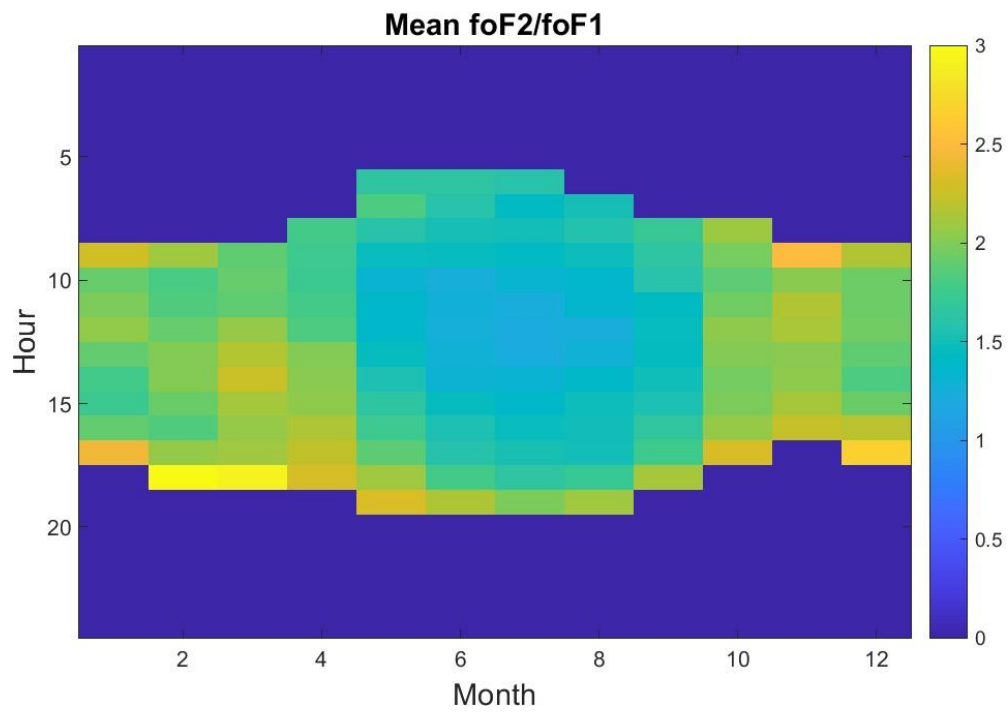

This shows that both foF2/foE and foF2/foF1 fall below their critical values in the summer daytime. This is consistent with high values of foE and foF1 (whose peak densities are strongly controlled by peak ionisation rates occurring during times of depleted noon foF2 densities due to increased thermospheric molecular content leading to an enhanced loss rate.

Changes in thermospheric composition are therefore leading to a breakdown in the reliability of the empirical formula through the suppression of foF2 and/or the presence of foF1. Since foE and foF1 are highly correlated, it is challenging to deconvolve their relative contributions to the bias seen in the empirical formula, with the correction of the foF2/foE bias also correcting for any bias resulting from the presence of foF1.

As with the foF2/foF1 ratio, long-term changes in thermospheric composition will therefore introduce a long-term bias into any estimates of hmF2. That. We have therefore expanded the discussion section to include how the foF2/foE ratio changes with time.

Uncertainty in ionosonde-derived hmF2

$$\sqrt{\left(\left(-355 / (x - 1.4)\right)^2 * M^{((2.5 * x - 3)^{-2.35} - 1.6)} - 5.875 * (2.5 * x - 3)^{-2.35 - 1} * (1890 - 355 / (x - 1.4)) * M^{((2.5 * x - 3)^{-2.35} - 1.6)} * \ln(M)\right) * \Delta x^2 + \left(M^{((2.5 * x - 3)^{-2.35} - 1.6 + -1)} * (1890 - 355 / (x - 1.4)) * ((2.5 * x - 3)^{-2.35} - 1.6) * \Delta M\right)^2}$$

Revised figures show, as anticipated, smaller uncertainties in ionosonde-derived hmF2 values.

***Check unexpected striations in time series scatter plots***

*Can you double-check your plotting code in Fig 6 (likely applies to Fig 1 too)? And if all is coded OK, explain how the striations in panel a are arising?*

I have checked the code here and think the plots are correct. The striations in figure 6 and 1 are due to the annual ionospheric variability combined with the fact that foF1 is primarily a daytime summer phenomenon. As a result the F2/F1 ratio displays the fraction of the annual variation for which both foF2 and foF1 values are available.

***Flag up more clearly where your findings differ from others'***

*There are a few places throughout intro sections where you flag up ~detailed points from previous literature - often*

*I think as these run counter to what you find.*

*But you don't refer back to these when you present your results / conclusions.*

*Upshot is that it's not easy for the reader to spot these - requires multiple passes.*

*I'd recommend flagging any such disagreements up more explicitly somewhere: either in results as you go, or*

*aggregating somewhere just before/in conclusions.*

*Ones I've spotted (may well be more!)*

Thanks for this general comment, we have endeavoured to be more explicit as to how our results differ from others throughout the paper.

- L119: Xu not finding significant geomag effect (cf your Fig 8)

We do not have an explanation for this discrepancy but we note that their use of a different empirical model may result in this difference. We have added the following text;

'This could be attributed to their use of a different empirical model.'

- L215: B&D claiming F1 insignificant. OK, "claim", and it's ~clear that your whole paper is contesting this general point! But if B&D / derivatives get used as much as L246 implies, I think worth being blunt somewhere  
"B&D's claim is wrong"!

Now that the paper includes a bias in the foF2/foE ratio as well as foF2/foF1, it could be that the presence of foF1 is, in itself not the cause of the bias, but instead, an indication that changes in thermospheric composition (which also cause a reduction in foF2 and therefore of the two ratios). We have therefore opted not to make a stronger statement here.

• L487: the juxtaposition is a little too subtle for me - think you could make it clearer that that you're ~disagreeing with Jarvis. How about something like following?

@@ L488 @@

-explain this. Our results indicate that

+explain this. Our results indicate such mechanisms do not need to be invoked, rather that...

Changed as suggested.

### **Minor points**

L212: "They noted that  $x_E > 1.7$  is equivalent to about  $x_F \approx 1.2$ "

- Where are you getting 1.2 from? Looking at B&D I can't see this.

Closest match their sentence below, but I don't think this yields this equivalence. "(In the limit for  $x = 1.7$ ,  $f_1 = foF_2$  and we have an entirely linear F1/F2-layer.)"

This statement was in fact taken from Dudeney (1974). We have corrected the citation in the text.

### **Technical corrections**

#### **Improve equations: typesetting, M(3000)F2 consistency**

I found maths in section 2 a little hard to follow due to:

- M(3000)F2 factor changing form a lot
- equations having inline fraction form

Great if you could tighten this up a little.

#### **M(3000)F2**

Not your fault this ratio's name has such a convoluted form. Grr, not a single letter, no subscripts/superscripts,

just one long set of inline chars! Guess a fine ionospheric tradition - hmF2 etc - and historic typesetting constraints.

But this convoluted form doesn't help readers parse these equations, twig it's just a factor.

Even harder as the

form in this section changes quite a bit:

- Same thing: specific case: M(3000)F2, M3000F2
- Not the same thing: general case: M (looks like eqn 2 is for a general layer)

Realise that for sake of for sake of clarity/historic continuity, in specific case you'll have to use something like

$M(3000)F2$ . But there:

- can you use the  $M(3000)F2$  form consistently please - not  $M3000F2$
- great if there's anything you can do with typography to make it clearer this is just a factor!  
–  $M_{\{3000\}^{\{F2\}}$  say?
- ignore me if this won't wash!

Thanks for pointing this out. I have unified the text to be  $M(3000)F2$  everywhere for the time-being and will raise this with the type-setters.

Generally, there are various divisions going on in these equations. With the current inline fraction form it's much harder to follow them.

Could you change these to non-inline fractions please?

Another good suggestion. We have changed the form of the equations to use the  $\frac{\{\}}{\{\}}$  form as suggested.

Few other minor things to correct:

- Eqn 6: +/- instead of  $\pm$

Done.

- Eqn 7:  
–  $MF$  and  $\Delta M$  terms need to be better separated

Done, as suggested.

- $\Delta M$  term has a  $\sim$  symbol - checking Dudeney, this should be a minus sign

Done

### **Make various things more explicit**

There are various places where things were quite implicit, and I had to work ~hard to understand. Might be just me, but am flagging these so you're aware. I think you could usefully make these more explicit, to:

- help convey (what I think are!) your messages
- help less-expert readers follow subtler points (likely ~obvious to you / other experts, but could help this important work get a wider readership / impact)

I've put some suggestions for text which would likely have helped me in most places.

- Very interfering / word-smith-y - naturally please adjust / ignore as needed!

### **Abstract**

**Make importance of this work clearer** Clarify up-front that effect you've found is of same order as climate signal, so could mask latter / cause misattribution

@@ L1 @@

-Long-term change in

+Long-term reduction of ~20 km

Changed as suggested, thank you.

@@ L9 @@

-  $\pm 25$  km an altitude of 250 km).

+  $\pm 25$  km at an altitude of 250 km, i.e. similar to the long-term climate signal change being sought).

Changed to 'These are of similar magnitude to layer height changes anticipated as a result of climate change.'

*Other: clarify this "shown" part of the point being made comes from previous work, not this one*

@@ L12 @@

-have been

+have previously been

Changed as suggested, thank you.

### **Introduction**

**Effects** I lost you a little in the discussion of the effects (L44 - L58). As this is ~crucial for this paper, a few overall ideas on making this section easier for non-experts - some specific ones below.

Overall points:

- *Multifaceted nature / spatiotemporal scales of processes: Once I realised importance of this list, I had to draw out diagrams for myself to distinguish the processes, how they work, and outcomes. I don't think a diagram required - but would be helpful to flag up a few things readers should consider when reading list. Specifically outlining at outset sentence that (I think!) effects cover a range of timescales. And that a specific effect can encompass a ~complex set of in/direct processes, which can be local or remote (e.g. advected in).*

We have changed the introduction to this list to state;

'Above a given ionospheric monitoring station therefore, changes to the height of the ionosphere are a superposition of several different effects, occurring across a wide range of temporal scales from long-term ( $\sim$  multi-decadal) through solar cycle ( $\sim$  decadal) to individual space weather events  $\sim$  hours. These can be grouped into several interrelated categories;'

And added a reference to a paper discussing such effects;

'Detailed discussion of contributions to ionospheric long-term change have be presented by Rishbeth and Clilverd (1999)'.

(Henry Rishbeth, Mark Clilverd, Long-term change in the upper atmosphere, *Astronomy & Geophysics*, Volume 40, Issue 3, June 1999, Pages 3.26

3.28, <https://doi.org/10.1093/astrog/40.3.3.26>)

- *Clarity on spatiotemporal scales of effects: Optional, but consider whether here / in a separate paragraph / even a table below, for each effect, it's worth briefly discussing timescales (storm -> solar cycle(s)) and spatial extent - just in auroral zone, or more global due to transport?*

We hope that including the above reference will provide the reader with a source of such information without having to go into too much detail that is not central to the narrative of this paper.

- *Process impact on height: Have you put these effects in order of ~expected impact on height? Ignore this if you can't / haven't. But if so, indicate explicitly!*

No, this list is not in any particular order in terms of expected impacts on ionospheric height. Again, we would rather not deviate from the central narrative to discuss this so have taken you up on your offer to ignore this.

- *List of effects here: yours / someone else's / common knowledge? Can you be more explicit (e.g. "therefore we expect that changes") if to your knowledge you're the first authors to give this enumeration of effects. Helps readers sense-check "is this everything / is something missing?". Else a citation if someone else has listed these before.*
- *Citations: If ~easy to do, worth putting in an overall reference / specific references to each effect. Your point 2. got me fishing out Schunk & Nagy, and checking block diagram of energy flow in Ch9!*

We hope that both the above points are addressed by the inclusion of the reference to Rishbeth and Clilverd 1999.

*Specific points:*

- *effect 1: demarcate better the loss rate change covered above, from the height change introduced here*  
@@ L46 @@  
*-thermosphere which increases the height*  
*+thermosphere, as described above. This also increases the height*

Changed, as suggested.

- *effect 2: be bit more specific on solar irradiance process*  
@@ L48 @@  
*-to the atmosphere, increasing*  
*+to the upper atmosphere (thermosphere, ionosphere, mesosphere), increasing*

Changed, as suggested.

- *@@ L49 @@*  
*-of the atmosphere*  
*+of the upper atmosphere, and hence raising of pressure levels*

Changed, as suggested.

- *effect 3: Make the composition point clearer. This is where I was glad I'd drawn out diagrams for myself! Helped me see that all other processes were changing the height of layer features (e.g. hmF2), whereas this process seemed not to. As written, ~implies this is only directly changing the density (e.g. nmF2). I think this is your intent - rest of article showing that such changes to (say) F1 densities can contaminate hmF2 reconstructions. I've suggested an extra sentence at end of intro to discuss this point, and tease out this*



*difference. But possibly worth flagging this up already here? E.g. via tweak below? Of course, if the composition changes also directly affects true feature height (not just density), then alter tweak! In that case, recommend being as explicit as you can.*

*@@ L49 @@*

*-greater altitudes*

*+greater altitudes. Profile changes mainly affect densities,*

*+but this can indirectly affect height estimates.*

The point we were trying to make here is that if you erode the lower edge of the electron concentration profile through changes to loss rate, the lower edge of the peak can be eroded too, resulting in a new -weaker- peak at a different altitude.

We have added the following text to clarify this point;

*'Changes to the shape of the ionisation profile can alter the altitude at which the peak electron concentration is established.'*

*• effect 5: clarify that this effect acts exclusively on long-term timescales?*

We have added the sentence

*'This latter effect is predicted to alter the height of ionospheric layers over a multi-decadal timescale.'*

*• L64: might need rewording for clarity 4 and 5? Think only 5 is discussing contraction. And isn't your point in following sentence and section that most authors considered residual to be 5 alone? Whereas only a few - Jarvis, Bremer, Mikhailov - have pointed out that at least 4 can affect long-term trend too?*

*If so, something like following?*

*@@ L63 @@*

*-due to the contraction of the thermosphere assumed to be the dominant part of (4) and (5).*

*+widely assumed to be dominated by the contraction of the thermosphere (5).*

Changed, as suggested

**Composition and circulation, effect 3** *Recommend you also consider adding/moving following to this section:*

*• moving your composition+circulation discussion from ~L431 - L439 to this section*

*• appending a brief discussion about effect 3*

Rather than moving a discussion about an explicit station to this general section, we have added the following text to effect 3;

*'Such compositional changes can result from thermospheric circulation both on a seasonal timescale and as a result of space-weather related events increasing the molecular fraction of the upper thermosphere which is then transported equatorward via thermospheric circulation.'*

*Composition+circulation discussion: I think you could usefully move this to introduction, say just before the effects discussion Highly relevant, and usefully bulks out wind pattern change*

*point, as well as better motivating the seasonal timescale. Currently the intro doesn't give much indication about why results consider seasonal timescale carefully - current timescales are really only ~ diurnal, space weather event, climate. This would help fill out spectrum! Having this here would also let you refer back to this in discussion of Scott et al ~L240.*

This is a useful observation, thank you. Rather than moving the discussion about two explicit locations to this general section however, we suggest adding the following text to the introduction to introduce the concept of seasonal change;

'Seasonal changes in thermospheric circulation coupled with seasonal changes in geomagnetic activity produce seasonal variability in thermospheric composition that varies with location.'

*Brief discussion on 3: I think worth adding something to end of intro:*

- *while it's very easy to juxtapose with the other effects*
- *to re/plant seed in readers' minds*
- *to help introduce following section*
- *to explicitly tie this in with wider thrust of paper*

*Something along lines of following - playing around with true/measured as appropriate!*

*"Absent from most previous literature has been consideration of the ionisation profile changes in (3). This effect may seem irrelevant, as it mainly affects the density of given features in the profile, rather than their true height. However, such density changes can have an indirect effect on estimates of this true height using ionosonde measurements, as discussed in the following section. And hence, as we show in this paper, can contaminate efforts to reconstruct true height estimates to extract the target climate signal from (5)."*

Thanks for this suggestion. Further investigation suggested by the referee has revealed that the observed bias in hmF2 can be attributed to foF2/foE and foF2/foF1, and that these biases cannot easily be deconvolved. However, both are signatures of compositional change. We have opted to generalise the suggested paragraph slightly to the following;

'Absent from most previous literature has been consideration of the ionisation profile changes in (3). This effect may seem irrelevant, as it mainly affects the electron concentration of given features in the profile, rather than their true height. However, such profile changes can have an indirect effect on estimates of this true height using ionosonde measurements. As discussed in the following section, this can potentially introduce bias into reconstructions of true height estimates needed to extract the target climate signal from (5).'

### ***Measuring the ionosphere using ground-based radar***

***Scaling*** You briefly cover inverting (L84), but don't really cover scaling, despite referring to this later (L164). "Scaling" is quite jargon-y, so may not be accessible to all readers.

*Once you got to B&D discussion of foF1, I had to do a quick refresher on ionosondes. I ended up needing to go quite deep into INAG links to understand what the issue was.*

*As you're (necessarily!) going into the weeds in this paper, possibly worth:*

- *adding a brief description of scaling process*
- *adding some citations to guides to both scaling and inverting ionosondes?*

*I ended up looking at the below for scaling. Might usefully supplement Rishbeth & Garriott (which I didn't check)?*

Flagging resources like this helpful:

- for any readers wanting to do a deeper dive here
  - esp to any you motivate to run with data-rescue inversion efforts!
- ~Old guides for scaling linked off <https://www.sws.bom.gov.au/IPSHosted/INAG/> :
- Wakai, Ohyama and Koizumi, 1987, *Manual of Ionogram Scaling*, Radio Research Laboratory, Japan, 3<sup>rd</sup> edition, [https://www.sws.bom.gov.au/IPSHosted/INAG/scaling/japanese\\_manual\\_v3.pdf](https://www.sws.bom.gov.au/IPSHosted/INAG/scaling/japanese_manual_v3.pdf)
  - Piggott & Rawer (eds.), 1972, *U.R.S.I. handbook of ionogram interpretation and reduction*, 2nd edition, UAG-23A, World Data Center A, [https://www.sws.bom.gov.au/IPSHosted/INAG/uag\\_23a/UAG\\_23A\\_indexed.pdf](https://www.sws.bom.gov.au/IPSHosted/INAG/uag_23a/UAG_23A_indexed.pdf) (note high latitude supplement linked from top link too)

Thanks for this. Yes, we agree that 'scaling' is jargon and so have added the following text to the section describing the creation of ionograms;

"Tabulating the entire ionospheric height profile was not routinely carried out in the early days of routine ionospheric monitoring. Instead, international standards were established for the identification and recording of key features on each ionogram, such as the peak frequencies of each layer and their virtual heights (Piggott & Rawer, 1978). This task is referred to as ionogram 'scaling' or 'reduction' and was usually carried out by a skilled individual or small team from each ionospheric sounding station to ensure consistency of the data."

We have cited Piggott and Rawer as their work represents the early consensus reached through the international organisation URSI.

### **Using ionosonde data to estimate hmF2**

**Motivation** *I think you could usefully make it even more explicit here what the motivation for using ionospheric measurements is, and hence why so many authors have tried. A few suggestions:*

@@ L97 @@

- effects are altitude dependent which will lead to differing results. Searching
- +effects in the upper atmosphere are altitude-dependent, which will lead to
- +unhelpfully differing results, depending on the altitudes of the specific
- +observations in each study.
- +By contrast, searching

Text changed, as suggested.

@@ L99 @@

- The longevity of ionospheric data series
- +Furthermore, of the upper atmosphere regions, the ionosphere is unique as it can
- +be observed remotely with relative ease. Due to the ionosphere's importance for
- +long-distance radio communication, such observations have been made routinely
- +since the early 20th century. The resulting longevity of ionospheric data series

Text changed, as suggested.

@@ L101 @@

-can be extracted from the data, allowing for all other effects.  
+can be extracted from the data, with all other potentially-confounding effects compensated for.

Text changed, as suggested

@@ L102 @@

-The first published analysis  
+This potential has motivated similar re-analysis of ionospheric data,  
+seeking evidence of climate-driven trends.  
+The first published analysis  
Be more explicit on what relevance is:

Text changed, as suggested

@@ L115 @@

-Kokubunji in Japan with  
+Kokubunji in Japan (the same station examined here) with

Text changed, as suggested.

**Ap and am** L131: Ap index vs am index: Somewhere appropriate (here / a very short new section 2.3 / section 3.4) it would be good to have a brief discussion of this, making it explicit why you use am, rather than the Ap you flag has been used by most previous studies have used Ap! Took me down a bit of a rabbit hole refreshing myself on am - had been a while! I think I eventually got my answer from Mienville & Berthelier, 1991, The K-derived planetary indices: Description and availability, <https://doi.org/10.1029/91RG00994>:

- end of their section 5 basically says that better sensitivity and distribution of Km network (cf Kp) makes am more suitable for statistical studies.

If this sort of reasoning governed your collective choice to use am, could you add a brief explicit sentence to this effect, citing Mienville & Berthelier.

- Or Lockwood+ 2019 which you cite already - looks like similar reasoning in there Say this as if “accurate and painstaking” is required, favouring am over Ap seems very aligned: worth making your reasoning explicit, so others can follow suit!

Again, a very useful point. We have added the following text in section 3.4 to justify our use of the am index when comparing with the bias in the modelled hmF2 values;

“We here choose to use the am index rather than the Ap index used in previous studies. The response patterns of the individual magnetic observatories used to compile such indexes depend strongly on the level of geomagnetic activity. At low activity levels the effect of solar zenith angle on ionospheric conductivity dominates over the effect of station proximity to the midnight-sector auroral oval, whereas the converse applies at high activity levels. It has been shown (Lockwood et al, 2019) that these biases are far smaller for the am index than for Ap”

**Confounding factors** Make it more explicit that the tempting elision that “remaining trend == climate change” is dangerous? And loop back to your different effects from introduction? E.g.

@@ L134 @@

-Mikhailov and Marin

+When analysing such trends in residuals however, it is important not to assume  
+any local environment changes which may underly this can be attributed to  
+greenhouse forcing alone.  
+The previously-discussed effects altering thermospheric composition (3)  
+and wind patterns (4) risk being confounding factors, as they can potentially  
+also lead to trends on long timescales.  
+Mikhailov and Marin

Text changes, as suggested.

**Clarify scope** L160: worth being blunter, as think you've been nicely impartial in the actual analysis?

• if you adopt my "in section X" suggestion below, you could leave this as-is, and have summary outcome in there

@@ L160 @@

-to investigate the efficacy of

+is to demonstrate the potential pitfalls in

Text changed as suggested

L161: current sentence ~implies the present work is looking into this reconciliation globally. Section 3.4 is a great start, and you've ~convinced me that global trends need to be reinterpreted in light of this paper, to see if reconciliation possible. But given this paper only examines Kokubunji, Chilton, and Stanley, this sentence may need watering down a little.

E.g.

@@ L161 @@

-investigate the extent to which this can reconcile the difference

+demonstrate that such effects may have potential for reconciling the differences

Text changed, as suggested.

**Add an outline** L162: you lost me a little in section 2, trying to keep key bits in my working memory, and interpreting the detail you're exposing in light of this, while we're (necessarily!) knee-deep in complex empirical equations!

I think you could usefully insert a brief outline here at L62, summarising what you'll do & key findings. A la "In Section 2, we do XYZ and show, In Section 3 ...".

Would let readers see where you're going, so help follow the thread of your argument better once in there - and flick back to this if they lose thread!

Thanks for this suggestion. We have added the following text;

"Section 2, contains a summary of various methods used to derive  $h_mF_2$  estimates from routinely scaled ionospheric parameters, and the assumptions made in doing so. Thereafter, section 3 will examine the accuracy of such estimates through comparison with ionospheric heights measured by Incoherent Scatter Radar."

**Estimating  $h_mF_2$  from empirical formulae**

**Existing parameters** To make point clearer to those less familiar with ionosondes, something like following:

@@ L167 @@

-from existing scaled ionospheric parameters

- +from existing standard ionospheric parameters (e.g. foF2, MUF).
- +Determining these from an ionogram only required a scaling process (not inversion),
- +hence these were routinely calculated from ionograms at the time of measurement.

Text modified, as suggested.

**Minor fluctuations** L204: *I'm not following. Can you try to interpret what B&D / their Paul ref means? Is the point that:*

- *these are true F1 layers, but hard to pin down, as noisy?*
- *this is effectively noise (ionospheric variability / instrumental) getting mislabelled as F1?*

I think their point was that, while an additional layer had been identified, it did not necessarily represent a major change in electron concentration.

We have addressed this point by adding the following text (indicating that the presence of an F1 layer did not represent a significant increase in electron concentration)

*Good if you could also tweak "more ubiquitous" on L207 to whatever is more appropriate:*

- *more ubiquitously-recorded*
- *less contentious*

We have changed the text to read 'ubiquitously-recorded' as suggested.

**Shape of profile** L213: *I don't follow - can you clarify what this "well above the limit" profile point means? I assume this supports B&D's argument that their approach means any F1 ionisation present can be ignored. But I'm unclear why. Especially if they were doing this off synthetic ionograms. Is this:*

- *a "how far are F2 and E separated along x-axis" measurement error type argument?(!)*
- *a physics-based argument on the retardation between E and F2 exceeding retardation from F1 features above this cutoff foF2/foE ratio?*
- *other?*

Thanks for pointing this out. We have corrected the reference to foF2/foE ~ 1.2 (this came from Dudeney, 1974) and added text to clarify what was meant by this and how comparison with real data by Bradley and Dudeney led them to the conclusion that the presence of an F1 layer had minimal impact on their estimates of hmF2.

"...sufficiently close to the layer critical frequency to make a significant contribution to the total group delay of the radio pulse. However, Bradley and Dudeney (1973) compared estimates of hmF2 with heights determined from ionogram inversion for a number of different locations, over all seasons and for solar cycle extremes. These results supported their conclusion that the presence of an F1 ledge had minimal effect on hmF2 estimates calculated using their empirical formula."

**Limitations** *Can you give a physical insight? E.g.*

*@@ L217 @@*

*-X<sub>E</sub> < 1.7, which*

*+X<sub>E</sub> < 1.7, due to a more ionised E layer, which*

Possibly worth adding foF1? Belabours point from previous sentence, but think OK, as it's a key finding of this paper that this is wrong!

@@ L219 @@

-field.

+field. And by definition this assumes F1-related effects are negligible.

Thanks for this. We have changed this paragraph to read;

While powerful, this method cannot be used when  $X_E < 1.7$ , which frequently occurs during the daytime summer at mid to high latitudes (Dudeney 1974). Here the E-layer is strongest due to increased ion production while the F2-layer is often weakened through an enhanced loss rate resulting from a higher fraction of molecular species in the upper thermosphere. In addition, this formula does not account for the effects of the Earth's magnetic field.

**Which formula? L246: "refinements of the formula":**

- a specific one? If yes, can you specify which one
- if general class, can you be clearer, e.g. "refinements of similar formulae"

Thank you for pointing out this ambiguity, We have changed this to read 'refinements of similar formulae'

**What is impact of foE = 0.4 MHz assumption? L279: can you indicate what expected impact of this fixed foE assumption is on hmF2? (realise elsewhere you say noise in results - I'm less sure! Here's why)**

*I assume this acts as a floor - the true foE would likely be lower, but this can't be measured, so it gets floored (ceilinged really!) to 0.4 MHz?*

*If so, what is this going to do to the "true" hmF2?*

*From a quick play with B&D eqn in Excel, and guessing some values:*

- foE = 0.001 - 0.4
- foF2 = 5 - 7
- $M(3000)F2 = 3$  I think this floor will impose a very small < 5 km shift downwards on the value of hmF2 which would be calculated with the "true" foE. And this would affect night time values, so the ~300 km mark. So should have a negligible effect on your plots & analysis? But would be good to have you check this, and to convey any such message.

The assumption that foE = 0.4 MHz at night appears to generate an underestimate of the derived hmF2 value. In addition, assuming that this value is a constant (when, at the very least it will have a diurnal component) introduced scatter around this underestimate. Residual nighttime E-region ionisation results from cosmic ray and astronomical x-ray sources. Adding to this is the fact that a typical ionosonde is insensitive to frequencies below ~ 1MHz. For a low night-time foF2 value, over-estimating foE will lead to an underestimate of the foF2/foE ratio and an underestimate of hmF2.

The effects of this are now apparent in the revised figure 2 where the populations are plotted separately, as advised. That the night-time estimates result in a lower gradient than the twilight population indicates that the assumed value of 0.4 MHz is an over estimate at night, being more applicable to (though still an over-estimate of) the E-region peak concentration at twilight (at least for this location).

We have changed discussion of figure 2 to read;

“From equation ??, over-estimating foE will lead to an underestimate of the foF2/foE ratio and an underestimate of hmF2. In addition, assuming that the value of foE is a constant (nighttime E-region ionisation results from cosmic ray and astronomical x-ray sources that will vary throughout the night) likely introduces scatter around this underestimate. Added to this is the fact that a typical ionosonde is insensitive to frequencies below ~1MHz.

With reference to figure 2, that the night-time estimates result in a lower gradient than the twilight population indicates that the assumed value of 0.4 MHz is an over estimate at night, being more applicable to (though still an over-estimate of) the E-region peak concentration at twilight (at least for this location).”

### ***The Kokobunji ionosonde data***

***Clarify binning, ionosonde data retrieved L282: worth defining & justifying binning better.***

*And enumerating all data retrieved.*

*Until I looked at code / thought hard about plots, I thought your monthly medians collapsed local time information. Also, it's only later that justification for medians appears. And that you also download F1 values. How about something like following? Longer, but covers all data, and makes why & how for averaging more explicit up front.*

*“To estimate hmF2, scaled critical frequency parameters for the E, F1, and F2 layers (foE, foF1, and foF2), as well as the M(3000)F2 factor were downloaded. Monthly averages were then calculated for these data, to protect against outliers caused by short-lived space weather events that are not representative of the data on monthly timescales. Specifically, hourly monthly medians were used - medians calculated across corresponding hours (in local time) within a given month. For a given year, this yields 288 median values (bins of 12 months, and 24 local time hours). Such hourly monthly medians of foE, foF2 and M(3000)F2 were then used to estimate corresponding hourly values of hmF2, the true height of the F2 layer, using...”*

Thank you for this observation. We have added the text as suggested.

### ***The Middle and Upper Atmosphere (MU) Radar***

***Clarify averaging***

*@@ L318 @@*

*-height profiles were then averaged to*

*+height profiles were then averaged over the four antenna positions to*

Changed as suggested,

*@@ L327 @@*

*-data, monthly means were*

*+data, corresponding hourly monthly means were*

Changed as suggested.

*@@ L328 @@*

*-35 years of data used in this study, observations have*

*+35 years of ISR data used in this study, ISR observations have*



Changed as suggested.

@@ L329 @@

-10080 bins (monthly averages for each hour over 35 years).

+10,080 bins (monthly means, in bins for each local time hour and month, over 35 years).

Changed as suggested

*I've suggested moving justification below to ionosonde section*

@@ L329 @@

-parameters, this is to protect against outliers in ionospheric

-concentrations caused by short-lived space weather events that

-are not representative of the monthly data. For the ISR data,

+parameters, for the ISR data,

Changed as suggested

### **Seasonal and diurnal comparison**

**Fig 1 interpretation** L339: recommend flagging up in text a few extra things which jump out at me from Fig 1:

- The ISR data are noisier.

- I assume because the campaign nature of ISR measurements means fewer underlying datapoints are available to constrain each hourly monthly mean datapoint?

- At solar min, the ISR data hit a floor at 180 km due to your sporadic E contamination procedure (suggest flag in figure too?)

While the code rejects values that are at the extreme ends of the altitude profile window, it is true that this arbitrary floor may lead to an over-estimate of hmF2 at these times. We have added the following text to address the point above.

“From this comparison it can be seen that the ISR data are noisier, due to there being relatively fewer data points from which the mean values are calculated. Also at solar minimum years some values are close to the \$180 km\$ floor of the altitude window in which the F2 peaks were identified.”

And added the following text to the figure caption;

“It can be seen that the ISR data are noisier, due to there being relatively fewer data points from which the mean values are calculated. Also at solar minimum years some values are close to the \$180 km\$ floor of the altitude window in which the F2 peaks were identified.”

### **Fig 3 interpretation**

@@ L351 @@

-averaging over the 35 years

+averaging the aforementioned 10,080 bins over the year axis, for the 35 years

Changed, as suggested.

L352: you don't explain the white lines - I had to look at your code to double-check interpretation. Can you:

- add an explanation that these are the  $\text{sza} = 90, 100$  limits used to isolate the previously-discussed day/terminator/night populations in Fig 2

- make these lines a bit thicker - the 90 one is particularly hard to see
- add lines like this to all subpanels, and all Figures like this
- consider a very brief discussion of results with respect to these?

Re latter, when I hand-draw similar lines on ISR, I see that for both ISR and ionosonde, dawn hmF2 hugs this  $\text{sza}$  line across all months. But that  $\text{sza}$  sn't constrain dusk hmF2, esp in winter months. I expect a ~easy Appleton anomaly explanation for diurnal, something else for seasonal. Would be good to have this flagged, and briefly explained by you!

As suggested, we have thickened the lines slightly (though we did not want them to dominate the plot) and replicated over all such plots.

In addition we have added the following text;

"The dotted and solid white lines overlaid on these plots represents the times at which the solar zenith angle is  $90^\circ$  and  $100^\circ$  respectively. These values were used to differentiate between the 'daytime', 'twilight' and 'nighttime' populations. It is interesting to note that there is a clear change in hmF2 at the dawn boundary which is less apparent at dusk. This is likely due to variability in the F2 layer at dusk which is 'reset' by the decay of this layer overnight.

We have also added the following text to the figure 3 caption;

'The dotted and solid white lines overlaid on these plots represents the times at which the solar zenith angle is  $90^\circ$  and  $100^\circ$  respectively'

@@ L353 @@

-peaks in hmF2 at

+peaks in night-time hmF2 at

Changed as suggested

Flag up midday summer peak

- you concentrate on this difference for ~rest of paper
- so good to flag up here that this is the target you'll concentrate on

@@ L354 @@

-a stronger peak

+an unexpected strong peak

Changed as suggested.

@@ L355 @@

-source of this bias

+source of this midday summer bias

Changed as suggested

**Fig 4 interpretation** L356:  $f_{oF2}/f_{oF1}$ : flag that this corresponds to  $x_F$  from earlier eqn 4  
L357:  $f_{oF2}/f_{oF1}$ : can you explicitly link back to discussion of eqn 4? Make point that B&D's range is nominally  $x_F > 1.2$  (note earlier query). But that here you're seeing it looks like it's more restrictive, that the  $1.2 \leq x.F \leq 1.6$  range is problematic?

We have added the following text;

'(the parameter  $x_F$  introduced when discussing equation 4)'

and

'It was expected that equation 4 should be valid for values of  $f_{oF2}/f_{oF1}$  above 1.2'.

Before going on to discuss the observed bias above 1.6.

**Correcting for foF1** L360: can you be explicit on how you've done this?

Ideally break this out into an equation, as there are a couple of times later where you could usefully refer back to this.

Good to have this made explicit - currently I've got questions/guesses below.

I assume making the assumption that for

- $x_F < 1.6$ ,  $hmF2\_iono\_true \approx hmF2\_ISR$
- $x_F \geq 1.6$ ,  $hmF2\_iono\_true = hmF2\_iono\_raw$ ?

And so you filter ionosonde data to select 1st branch ( $x_F < 1.6$ ).

And for those data you apply linear model  $hmF2\_iono\_true = (231 * x_F) + hmF2\_iono\_raw - 356$ ?

And you apply this to the binned hourly monthly median values (i.e. rather than to raw values, pre-binning)?

And for Fig 5, you do this after binning, but before collapsing over the year axis?

Yes, this is what we have done. While we have opted not to create an explicit equation for this result, we have added the following text to make this clearer;

'For each bin in figure 3 where  $foF2/foF1 \leq 1.6$ , the liner fit was used to calculate the bias and these biases were used to correct the ionosonde-derived values of hmF2.'

### **Long-term bias**

L380: reword - this is unclear. My guess:

@@ L380 @@

-to correct affected daytime values within the hourly monthly median hmF2 values.

+to correct affected hmF2 values (where  $foF2/foF1 < 1.6$ )

Thanks for pointing this out. This sentence was changed to read;

'The relationship between the bias in hmF2 and the  $foF2/foF1$  ratio established above was used to correct affected hmF2 values (where  $foF2/foF1 \leq 1.6$ ) before averaging by year.'

@@ L381 @@

-When plotted

+When daytime values are plotted

### **The impact of foF1 on the long-term drift in estimates of hmF2**

L411: if you followed my suggestion re model equation, here you could say "values, yielding similar models to eqn X, but for each year".

This is not what we have done. In the previous section referred to, we fitted the difference between the ISR and ionosonde derived values of hmF2 as a function of the  $foF2/foF1$  ratio.

Here, we are taking annual subsets and determining the bias between the ionosonde-derived and ISR measurements of hmF2. In this way, we can investigate whether the uncorrected formula introduces any long-term bias into the estimates of hmF2.

L413: add unit and make the interpretation clearer here!

@@ L413 @@

-of  $\pm 10\%$  ( $\pm 25\text{km}$  at 250)

+of up to  $\pm 10\%$  ( $\pm 25\text{ km}$  at  $250\text{ km}$ , i.e. a little larger than the  
+~20 km decrease expected from climate change)

Thanks for this. As we have been somewhat arbitrary in choosing a height of 250 km at which to determine any annual bias, rather than a qualitative comparison we have added the text;

'This is of the order of decrease expected from climate change'.

@@ L420 @@

-composition.

+composition, arising in turn from long-term changes in geomagnetic activity.

Changed as suggested.

*L440: can you make this point a little clearer?*

*I'm getting a bit lost on the temporal aspect - annual vs semi-annual. I think this is a red herring, not least as you're showing a clear difference in Fig 9 when you simply present annual averages!*

*I think the argument is ultimately altitudinal - what I'm (mis)understanding so far:*

- *near the poles, the neutral upwelling in summer disproportionately suppresses nmF2 (??? not sure why nmF1 less affected?)*
- *which pulls the yearly average of foF2/foF2 down?*
- *whereas further from poles, there isn't a strong altitudinal variation by season.*

Whether a station exhibits an annual or a semi-annual variation in foF2 is down to whether the annual variation in composition at F2 altitudes modulates the loss process more than the seasonal change in solar zenith angle affects the ion production rate. If the former, the station exhibits an annual variation (with a minimum foF2 in the summer, where loss rates are enhanced) if the latter, the semi-annual variation dominates. If there are also long-term changes in composition, the annual variation in ionisation will vary over time as each effect waxes and wanes in dominance. Previous studies have shown that changes in the power ratio of the annual/semi-annual variation in foF2 follow geomagnetic activity, through modulation of thermospheric composition. We raise this point here as it corroborates our current result.

Composition change primarily affects the F2 region where the difference between the lifetime of atomic and molecular ions is most apparent, leading to much larger changes in the peak density at equilibrium between production and loss processes.

In order to explain why it is largely the F2 layer that is affected by compositional changes, we have added the text;

'In contrast, the influence of compositional change on the peak concentrations of the E and F1 layers is much smaller, since molecular ions exist in much greater proportions at these altitudes and loss rates are higher due to the comparatively high thermospheric densities.'

## **Conclusions**

*L496: latitude only? Does longitude need considering too of circulation. Or is this ~purely meridional? Ask as ISRs which Bilitza 1979 used all have similar MLON (ie MLT) values.*

Yes, this is a fair point! We have changed 'latitude' to 'location'.

Good if you can add missing URLs

- Bradley & Dudeney: [https://doi.org/10.1016/0021-9169\(73\)90132-3](https://doi.org/10.1016/0021-9169(73)90132-3)
- Dudeney: <https://nora.nerc.ac.uk/id/eprint/509197>
- ...

We have added such links where we can

**Possible typos**

@@ L22 @@

- peak density of the F2 layer, foF2, would
- +peak density of the F2 layer, nmF2, would

Changed as suggested.

@@ L86 @@

- automatically identify and invert
- +automatically scale and invert

Changed as suggested

L92: citepshangguan2019

L96: citepphilipona2018

Citations corrected.

L175: I think this should be inverted, no?  $M(3000)F2 = MUF/foF2$  definition used by Elias 2017 (eqn 13), Japanese manual (p109), UAG (p23)

@@ L175 @@

- The ratio foF2/MUF
- +The ratio MUF/foF2

Thanks, changed!

L282: concentration vs critical frequency Think this should be critical frequencies, no, given foE and foF2, and formula definitions? So Note "concentration" is used quite often, and on a few other occasions is applied to a frequency, rather than a density/concentration. Realise these are ~equivalent (per eqn on line 68-69), but this doesn't help clarity. Could you do a search for "concentration", and try to rationalise this?

We have checked through the manuscript and altered where appropriate

@@ L282 @@

- The peak electron concentrations of the E and F2 layers (foE and foF2)
- +The critical frequencies of the E and F2 layers (foE and foF2)

Changed as suggested.

L296: fragment?

@@ L296 @@

-integrated over. In the ionosphere, While the  
+integrated over. While the

Changed to '...integrated over. In the ionosphere, while...'

@@ L342 @@

-Daytime data (for which the solar zenith angle,  $sza > 100^\circ$  )  
+Daytime data (for which the solar zenith angle,  $sza < 90^\circ$  )

Corrected as suggested

@@ L342 @@

-twilight data ( $90^\circ \leq sza \leq 100^\circ$ )  
+twilight data ( $90^\circ \leq sza \leq 100^\circ$ )

Changed, as suggested

@@ L382 @@

-values (figure 7, the correction  
+values (figure 7), the correction

Changed as suggested

@@ L383 @@

-the remaining offset is not 1:1.  
+the remaining gradient is not 1:1.

Changed as suggested

L388: ionosonde values being "generally still lower" and "underestimate of the F2 layer height". Err, are you sure?

- Lower in some bins - equinox night
- But not in others - midsummer night
- cf Fig 2: the two clumps I've flagged above/below trendline  
16

- No idea about "general" (average over all months), and how much there's in it!
- Think this is where my requested difference subpanel could help!

Yes, we agree that the variability is not as simplistic as this. We have changed the text to read;

'the night-time ionosonde-derived hmF2 values still show more scatter when compared with those measured by the ISR..'

*L469-L471: Comparing the before/after gradient values, I think you're currently a factor 10x too large in your reported improvements! Hence following changes*

Corrected as suggested in an earlier comment.

*@@ L469 @@*

*-resulted in an improved relationship*

*+resulted in a slightly improved relationship*

Changed, as suggested.

*@@ L470 @@*

*-the revised gradient for daytime hmF2 increases by 0.3 to  $0.89 \pm 0.01$*

*+the revised gradient for daytime hmF2 increases by 0.03 to  $0.89 \pm 0.01$*

Changed as suggested

*@@ L471 @@*

*-the equivalent after correcting for the presence of foF1 increases by 0.3 to  $0.92 \pm 0.01$*

*+the equivalent after correcting for the presence of foF1 also increases by 0.03 to  $0.92 \pm 0.01$*

Changed as suggested

Fig 2 caption

*-gradient of  $0.71 \pm 0.01$*

*+gradient of  $0.71 \pm 0.01$*

Changed as suggested

Fig 4 caption

*-(gradient  $231 \pm 21$ , offset  $-356 \pm 31$  km)*

*+(gradient  $231 \pm 21$ , offset  $-356 \pm 31$  km)*

Changed as suggested

Fig 5 caption

*-by the ISR (figure 5 lower panel-).*

*+by the ISR (figure 4, lower panel).*

Now that the figures all contain the ISR data, we have changed this to self-reference the same figure;

'by the ISR (top right panel)'

Fig 6 caption

*-(as identified in 4. It can*

*+(as identified in Figure 4). It can*

Revised figure captions no longer contain this text.
